# Supplementary material for: Determination of pretilachlor in soil and rice using matrix solid-phase dispersion extraction by capillary electrophoresis with field amplified sample injection and electrochemiluminescence detection
Source: Royal Society of Chemistry journal article supplement (doi:10.1039/c3ay41950a), 2014-01-01
Supplement: c3ay41950a.pdf [file c3ay41950a.pdf]

The figures which were not showed in manuscript submitted are now as the following, and they are used as supplementary explanation materials.

**1. Effect of various mass ratios of dispersant to sample matrix on recovery**

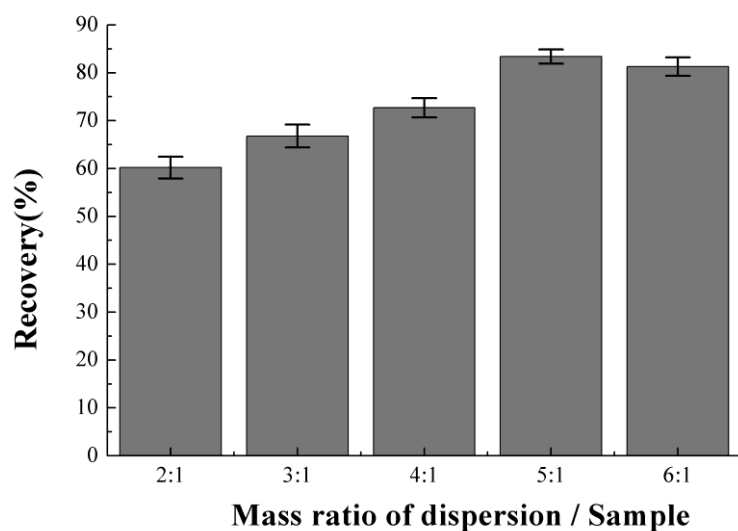

**Fig. S1** Effect of various mass ratios of dispersant to sample matrix on recovery

**2. Effect of ethyl acetate volume on recovery**

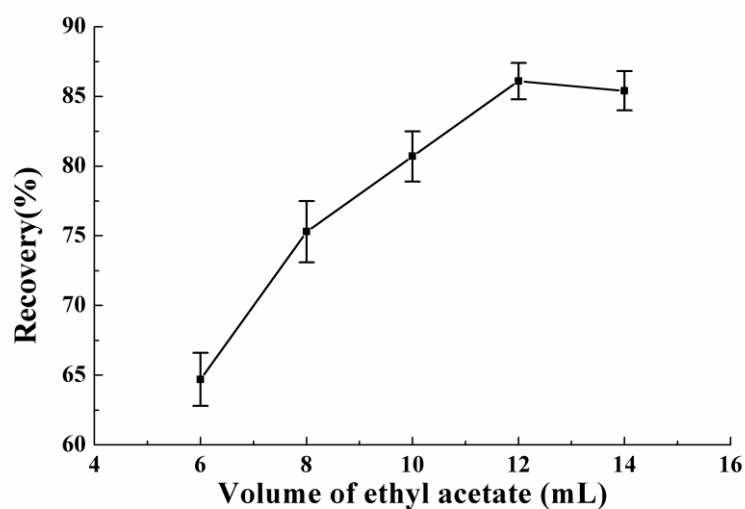

**Fig. S2** Effect of ethyl acetate volume on recovery

**3. Effect of pH (A) and concentration (B) of Tris-HCl buffer on ECL intensity**

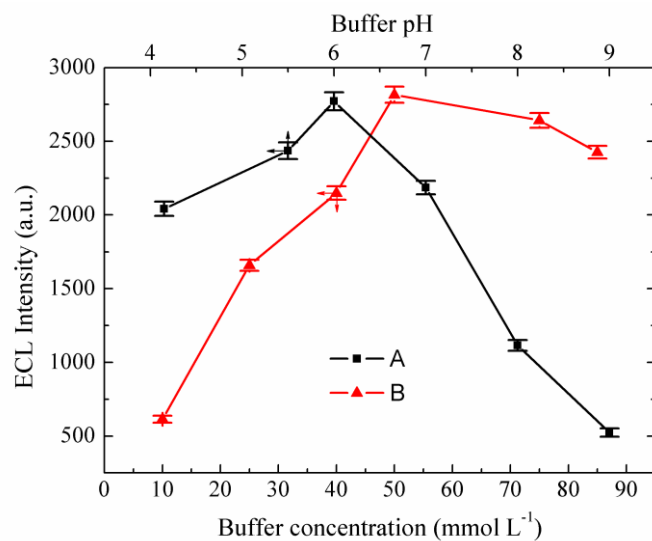

**Fig. S3** Effect of pH (A) and concentration (B) of tris-HCl buffer on ECL intensity

Condition: separation voltage 12 kV, detection potential 1.17 V, electrokinetic injection 8 kV×8 s,

ECL solution 5 mmol L<sup>-1</sup> Ru(bpy)<sub>3</sub><sup>2+</sup> with 50 mmol L<sup>-1</sup> phosphate buffer at pH 8.5.
